# Supplementary material for: Homo- and hetero-interactions between air bubbles and oil droplets measured by atomic force microscopy
Source: Royal Society of Chemistry journal article supplement (doi:10.1039/c1sm06006f), 2011-01-01
Supplement: c1sm06006f.pdf [file c1sm06006f.pdf]

# Homo- and hetero-interactions between air bubbles and oil droplets measured by atomic force microscopy - Supporting information

Rico F. Tabor,<sup>1,2</sup> Chu Wu,<sup>2,3</sup> Hannah Lockie,<sup>1,2</sup>  
Rogerio Manica,<sup>4</sup> Derek Y. C. Chan,<sup>2,3,5</sup> Franz Grieser,<sup>2,6</sup>  
Raymond R. Dagastine<sup>1,2\*</sup>

<sup>1</sup>Department of Chemical and Biomolecular Engineering, University of Melbourne, Parkville 3010, Australia

<sup>2</sup>Particulate Fluids Processing Centre, University of Melbourne, Parkville 3010, Australia

<sup>3</sup>Department of Mathematics and Statistics, University of Melbourne, Parkville 3010, Australia

<sup>4</sup>Institute of High Performance Computing, 138632, Singapore

<sup>5</sup>Faculty of Life and Social Science, Swinburne University of Technology, Hawthorn 3122, Australia

<sup>6</sup>School of Chemistry, University of Melbourne, Parkville 3010, Australia

\*To whom correspondence should be addressed; E-mail: rrd@unimelb.edu.au

## Dielectric data and Hamaker functions

Figure 1 shows the dielectric data used to calculate Hamaker functions. The Lifshitz method was used to perform the calculations.<sup>1</sup> Figure 2 shows the effect of using the different water constructions on the resulting Hamaker function for air-water-TD, at different salt concentrations.

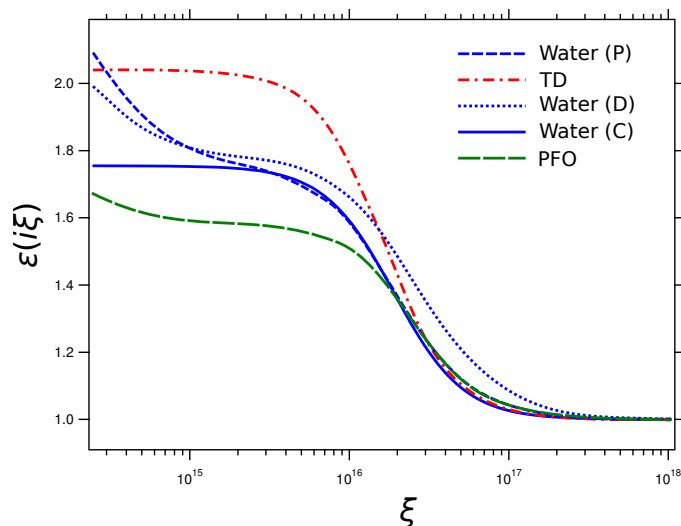

Figure 1: The dielectric constructions for the materials used in these experiments which were used to calculate Hamaker functions. For the three water functions, 'P' is the Parsegian-Weiss construction,<sup>2</sup> 'D' is the construction of Dagastine *et al.*<sup>3</sup> and 'C' is the Cauchy construction, using values from Hough and White.<sup>4</sup> 'TD' refers to tetradecane, and 'PFO' to perfluorooctane.

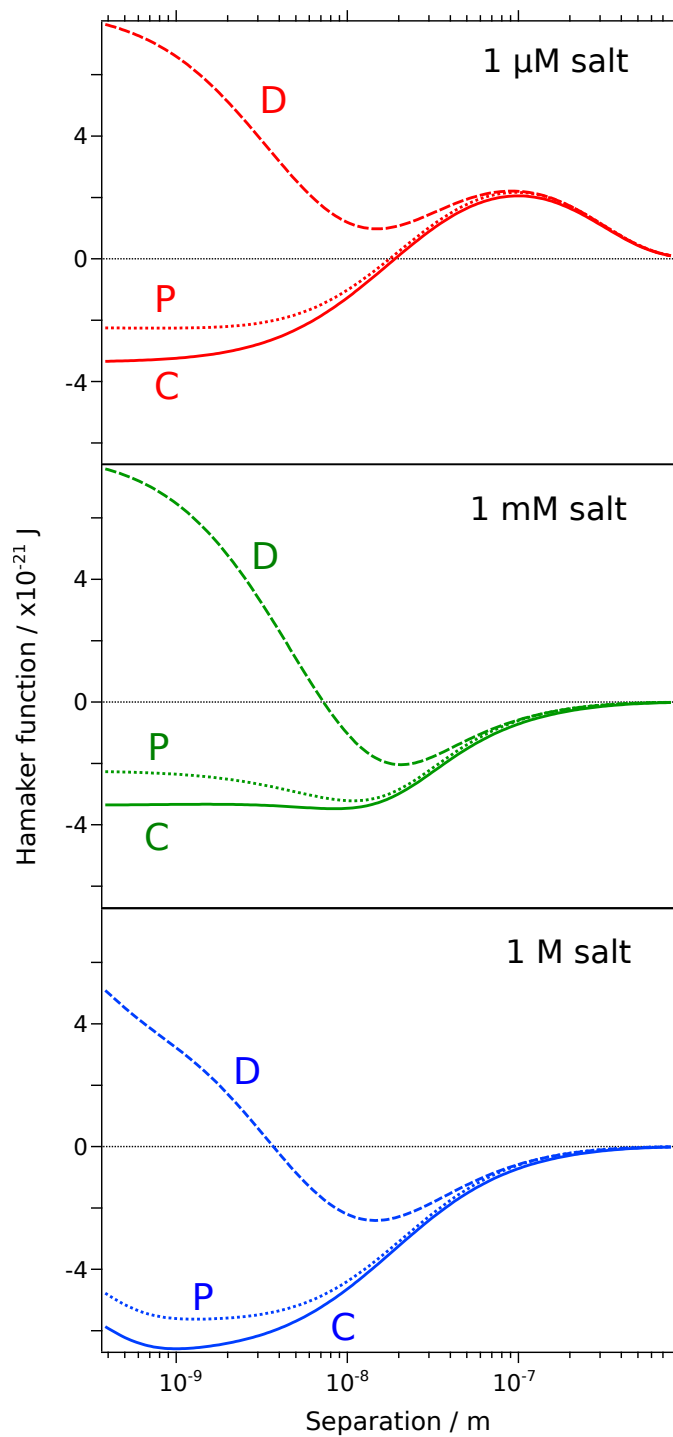

Figure 2: Calculated Hamaker functions for air-water-TD using different constructions for the dielectric function of water, and at different salt concentrations.

## References

- [1] I. E. Dzaloshinskii, E. M. Lifshitz and L. P. Pitaerskii, *Adv. Phys.*, 1961, **10**, 165–209.
- [2] V. A. Parsegian and G. H. Weiss, *Journal of Colloid and Interface Science*, 1981, **81**, 285–289.
- [3] R. R. Dagastine, D. C. Prieve and L. R. White, *J. Colloid Interface Sci.*, 2000, **231**, 351–358.
- [4] D. B. Hough and L. R. White, *Adv. Colloid Interface Sci.*, 1980, **14**, 3–41.
